# Supplementary material for: Chemical Ecology of Cave-Dwelling Millipedes: Defensive Secretions of the Typhloiulini (Diplopoda, Julida, Julidae)
Source: PubMed Central journal article supplement (PMC5399059; doi:10.1007/s10886-017-0832-1), 2017-03-16

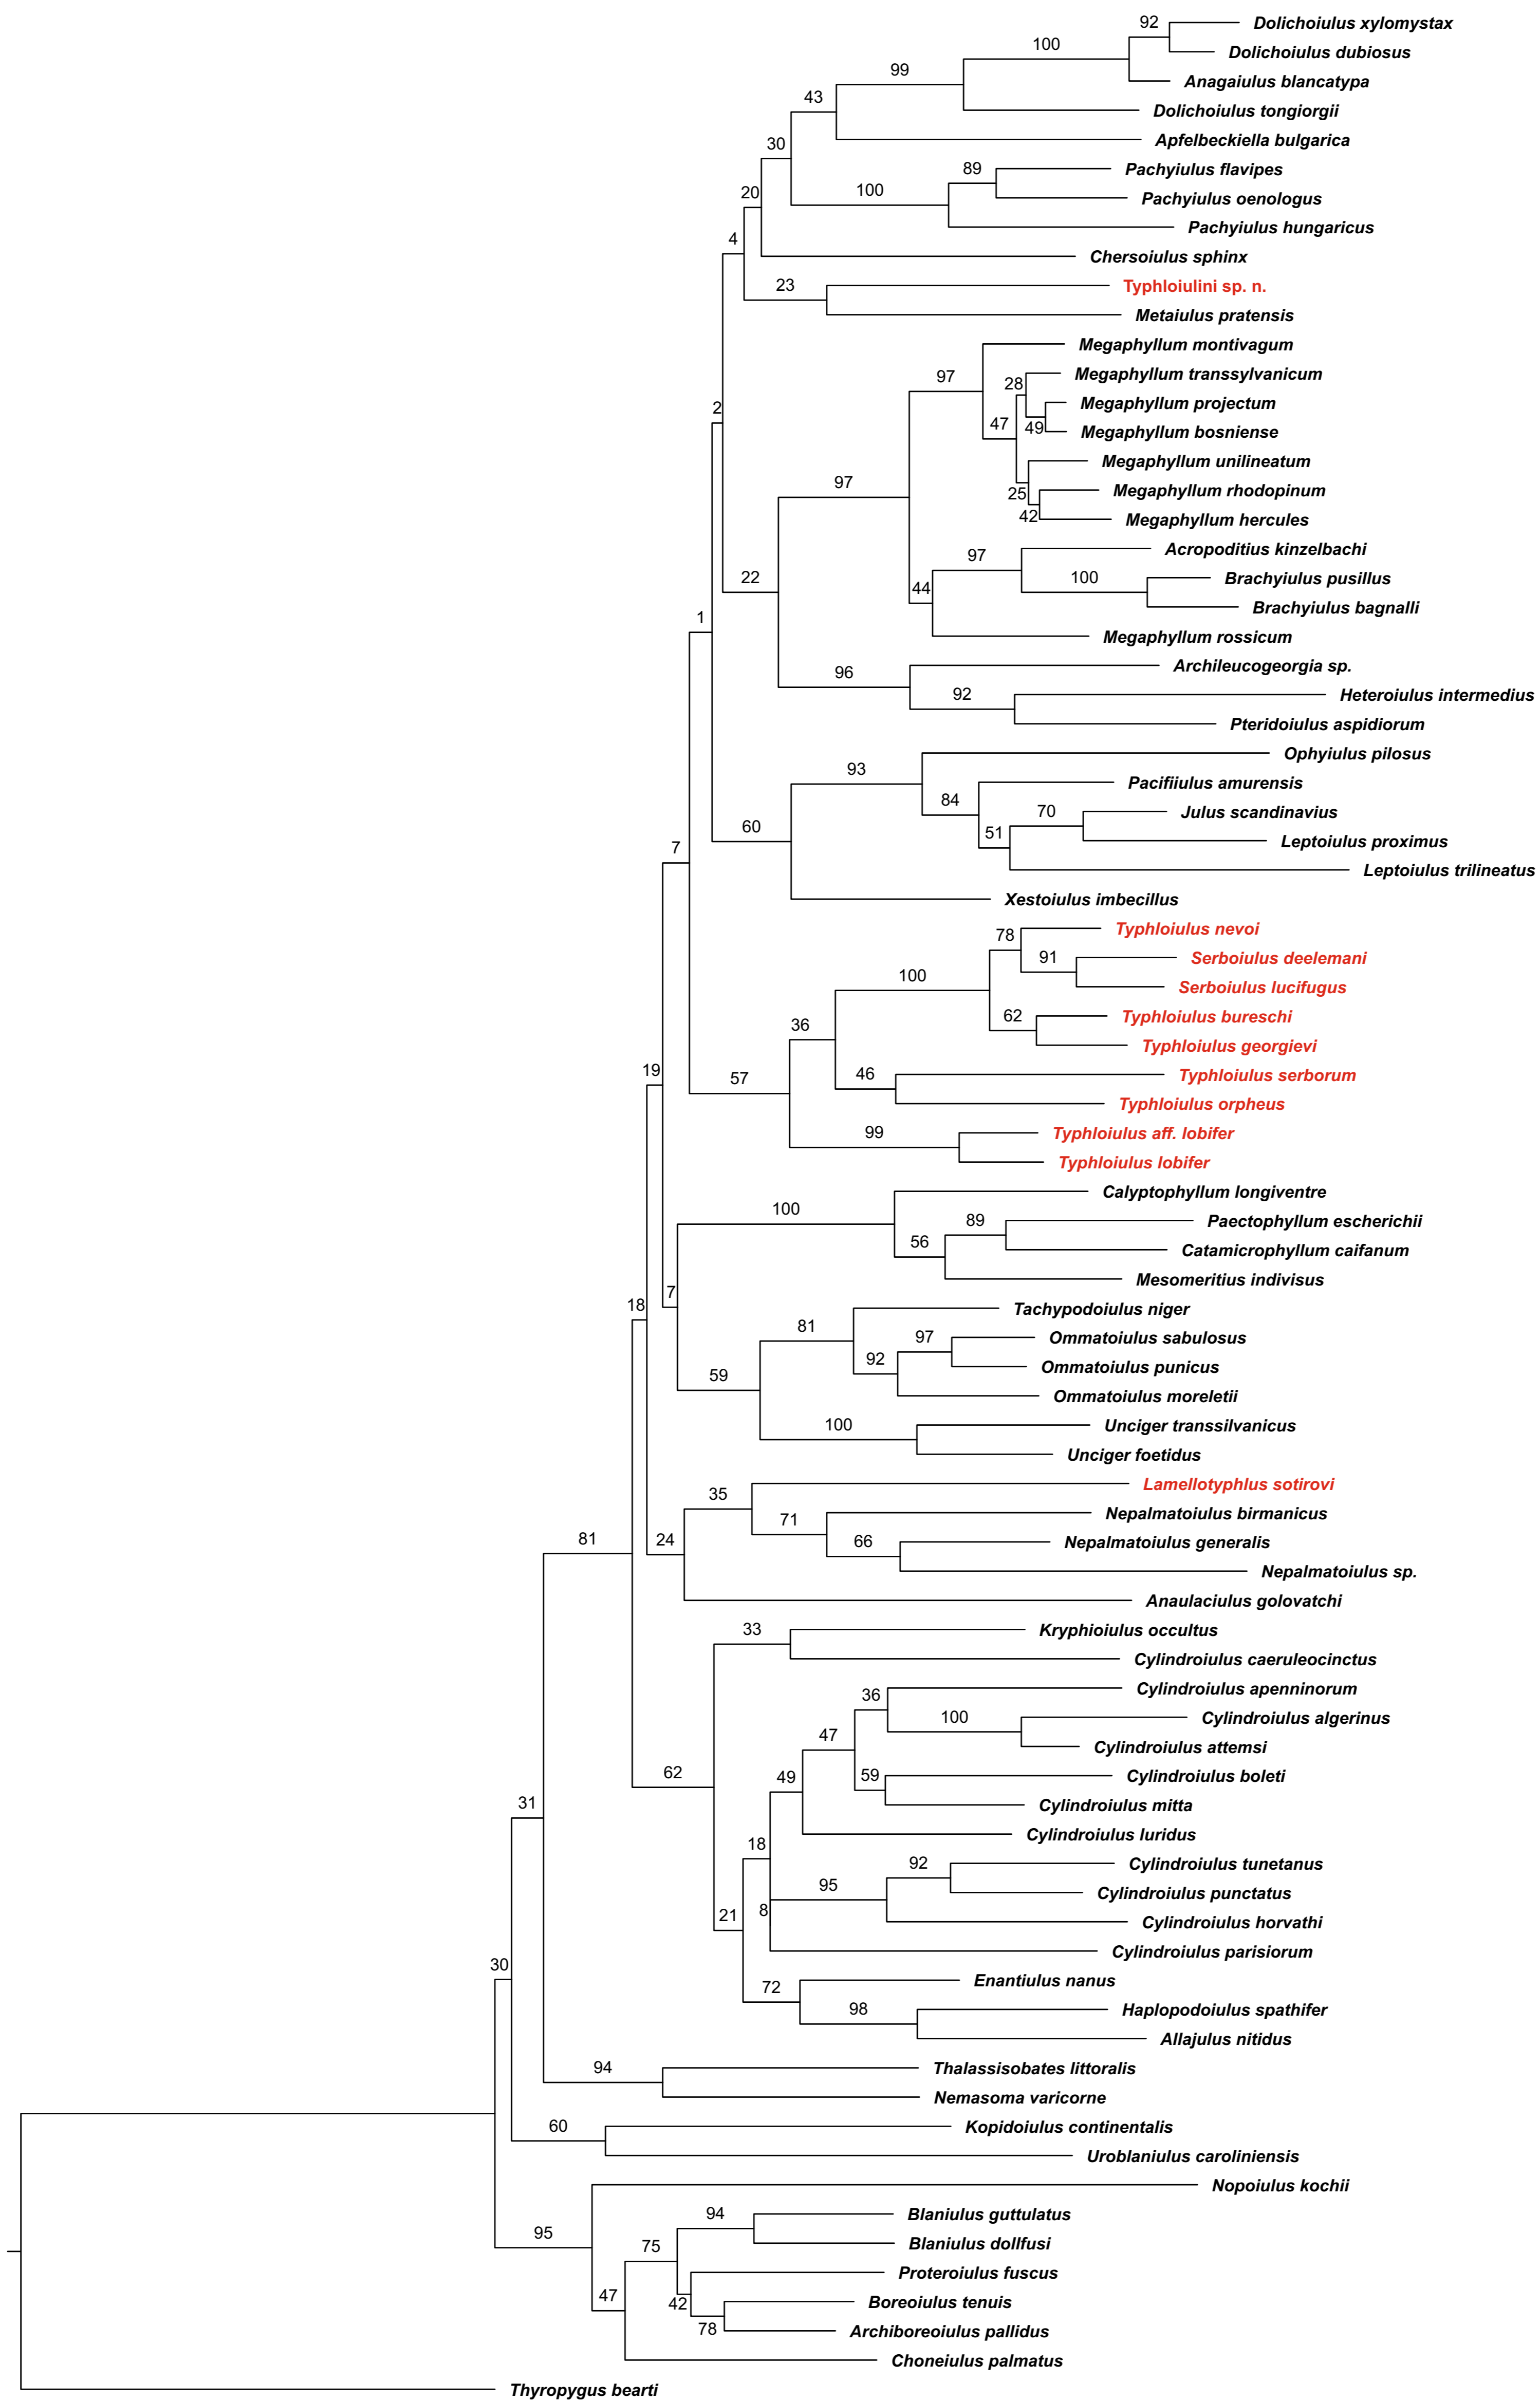

Supplement: 10886_2017_832_MOESM1_ESM.pdf [file 10886_2017_832_MOESM1_ESM.pdf]
